# Supplementary material
Source: publisher site journal article supplement (http://www.kjim.org/upload/media/kjim-2021-214-suppl4.pdf)
Supplement: Supplementary file 1 [file kjim-2021-214-suppl4.pdf]

**Supplementary Table 2. Baseline characteristics of the four SHS exposure groups in women**

| Characteristic                        | No SHS exposure<br>(n = 44,901)   | New SHS exposure<br>(n = 2,628) | Former SHS exposure<br>(n = 8,547) | Sustained SHS exposure<br>(n = 4,206) | p value |
|---------------------------------------|-----------------------------------|---------------------------------|------------------------------------|---------------------------------------|---------|
| Age, yr                               | 36.6 ± 5.5 <sup>b,c</sup>         | 36.4 ± 5.9 <sup>d,e</sup>       | 36.0 ± 5.6 <sup>b,d,f</sup>        | 37.3 ± 6.3 <sup>c,e,f</sup>           | < 0.001 |
| Body mass index, kg/m <sup>2</sup>    | 21.4 ± 2.8 <sup>a,b,c</sup>       | 21.7 ± 3.0 <sup>a,e</sup>       | 21.5 ± 3.0 <sup>b,f</sup>          | 21.9 ± 3.1 <sup>c,e,f</sup>           | < 0.001 |
| Waist circumference, cm               | 75.2 ± 7.6 <sup>a,c</sup>         | 75.9 ± 8.0 <sup>a</sup>         | 75.4 ± 8.0                         | 76.3 ± 8.2 <sup>c</sup>               | < 0.001 |
| Systolic blood pressure, mmHg         | 100.1 ± 9.7 <sup>c</sup>          | 100.3 ± 9.8 <sup>e</sup>        | 100.3 ± 9.7 <sup>f</sup>           | 101.3 ± 10.1 <sup>c,e,f</sup>         | < 0.001 |
| Diastolic blood pressure, mmHg        | 64.1 ± 7.5 <sup>c</sup>           | 64.1 ± 7.7 <sup>e</sup>         | 64.2 ± 7.6 <sup>f</sup>            | 64.9 ± 7.7 <sup>c,e,f</sup>           | < 0.001 |
| Total cholesterol, mmol/L             | 4.79 ± 0.81 <sup>c</sup>          | 4.80 ± 0.82                     | 4.79 ± 0.81 <sup>f</sup>           | 4.83 ± 0.84 <sup>c,f</sup>            | 0.006   |
| Triglycerides, mmol/L                 | 0.78 (0.60–1.05) <sup>a,b,c</sup> | 0.78 (0.60–1.06) <sup>a</sup>   | 0.78 (0.61–1.05) <sup>b</sup>      | 0.80 (0.61–1.10) <sup>c</sup>         | < 0.001 |
| LDL-C, mmol/L                         | 2.79 ± 0.72 <sup>c</sup>          | 2.80 ± 0.74                     | 2.78 ± 0.72 <sup>f</sup>           | 2.84 ± 0.77 <sup>c,f</sup>            | < 0.001 |
| HDL-C, mmol/L                         | 1.69 ± 0.38 <sup>c</sup>          | 1.69 ± 0.38                     | 1.69 ± 0.38                        | 1.67 ± 0.37 <sup>c</sup>              | 0.019   |
| Glucose, mmol/L                       | 5.03 ± 0.54 <sup>b,c</sup>        | 5.04 ± 0.60                     | 5.04 ± 0.55 <sup>b,f</sup>         | 5.08 ± 0.56 <sup>c,f</sup>            | < 0.001 |
| HemoglobinA1c, %                      | 5.57 ± 0.32                       | 5.56 ± 0.39                     | 5.56 ± 0.31                        | 5.58 ± 0.35                           | 0.160   |
| Creatinine, μmol/L                    | 61.7 ± 9.3 <sup>b</sup>           | 61.5 ± 8.8 <sup>d</sup>         | 62.1 ± 8.6 <sup>b,d</sup>          | 62.0 ± 8.5                            | < 0.001 |
| Uric acid, μmol/L                     | 246.8 ± 51.4 <sup>b</sup>         | 248.2 ± 51.5                    | 249.3 ± 51.3 <sup>b</sup>          | 247.9 ± 51.5                          | < 0.001 |
| hsCRP, mg/L                           | 0.3 (0.2–0.6) <sup>a,b,c</sup>    | 0.3 (0.2–0.7) <sup>a</sup>      | 0.3 (0.2–0.6) <sup>b</sup>         | 0.3 (0.2–0.6) <sup>c</sup>            | 0.194   |
| Alcohol consumption, g/day            | 2 (0–4) <sup>a,b,c</sup>          | 3 (1–6) <sup>a,d,e</sup>        | 3 (1–6) <sup>b,d,f</sup>           | 3 (1–7) <sup>c,e,f</sup>              | < 0.001 |
| Vigorous exercise<br>(≥ 5 times/week) | 1,543/44,000 (3.5)                | 106/2,566 (4.1)                 | 338/8,365 (4.0)                    | 188/4,109 (4.6)                       | 0.001   |
| Diabetes mellitus                     | 415/44,897 (0.9)                  | 33/2,627 (1.3)                  | 94/8,547 (1.1)                     | 67/4,204 (1.6)                        | < 0.001 |

Values are presented as mean ± standard deviation, number (%), or median (interquartile). Triglyceride, hsCRP, and alcohol consumption were log-transformed for this analysis. p values were based on one-way analysis of variance (ANOVA) or chi-square test.

SHS, secondhand smoke; LDL-C, low density lipoprotein cholesterol; HDL-C, high density lipoprotein cholesterol; hsCRP, high-sensitivity C-reactive protein.

Statistically significant ( $p < 0.05$ ) by Scheffe's multiple comparison: <sup>a</sup>no SHS exposure vs. new SHS exposure.

<sup>b</sup>No SHS exposure vs. former SHS exposure.

<sup>c</sup>No SHS exposure vs. sustained SHS exposure.

<sup>d</sup>New SHS exposure vs. former SHS exposure.

<sup>e</sup>New SHS exposure vs. sustained SHS exposure.

<sup>f</sup>Former SHS exposure vs. sustained SHS exposure.
